# Supplementary material
Source: PubMed Central journal article supplement (PMC10132776)
Supplement: NIHMS1867333-supplement-Supplemental_Material.pdf [file NIHMS1867333-supplement-Supplemental_Material.pdf]

**Supplementary Table 1. Items included in the secondary analysis looking at suicidal ideation, suicide attempt and suicide intent separately**

| <b>Suicidal ideation</b>                     | <b>Attempt</b>                         | <b>Intent</b>                                |
|----------------------------------------------|----------------------------------------|----------------------------------------------|
| BDI item 9                                   | Mini module C items 5 and 6            | BSSI/SSI item 21                             |
| MADRS item 10                                | BSSI/SSI item 20                       | CSSRS items on suicide intent                |
| MINI screening item suicide                  | CSSRS items on attempt                 | SIS items 1 to 13 and 14 to 17 and 19 and 20 |
| MINI module C item 1,3,4                     | KSADS item on attempt                  | Suicide Scale Score items 8,9,18 and 19      |
| BSSI/SSI items 1 to 19                       | SIS item 18                            |                                              |
| CDI item 9                                   | Suicide Scale Score item 6,7,16 and 17 |                                              |
| RCADS item 37                                | DIGS item on lifetime suicide attempt  |                                              |
| CSSRS items on ideation                      | SCID item on attempt                   |                                              |
| SIQ 1 to 3, and 6 to 26 and 28 to 30         | DIGS items on suicide attempt          |                                              |
| IDAS items 7 and 14                          | KSADS items on suicide attempt         |                                              |
| KSADS suicidal ideation item                 |                                        |                                              |
| SIS item 13                                  |                                        |                                              |
| Suicide Score Scale items 1,4,5,11,14 and 15 |                                        |                                              |
| DIGS item on suicidal thoughts               |                                        |                                              |
| SCID item on suicidal thoughts and plans     |                                        |                                              |

**Supplementary Table 2. Reliability of items, scales, questionnaires and interviews assessing suicidal thoughts and behaviours**

| Measure                                                                                                                                                      | Description                                                                                                                                                                                                                                    | Focus                                                                   | Inter-rater reliability                                                                                                                                                                                                                         | Internal consistency                                                                                                                                                                                                                                                                                                                                                                                                                    | Test-retest reliability                                                                                                                                                                                                                                                                                                                    |
|--------------------------------------------------------------------------------------------------------------------------------------------------------------|------------------------------------------------------------------------------------------------------------------------------------------------------------------------------------------------------------------------------------------------|-------------------------------------------------------------------------|-------------------------------------------------------------------------------------------------------------------------------------------------------------------------------------------------------------------------------------------------|-----------------------------------------------------------------------------------------------------------------------------------------------------------------------------------------------------------------------------------------------------------------------------------------------------------------------------------------------------------------------------------------------------------------------------------------|--------------------------------------------------------------------------------------------------------------------------------------------------------------------------------------------------------------------------------------------------------------------------------------------------------------------------------------------|
| Beck Depression Inventory suicide item; (Beck et al., 1961, 1996)                                                                                            | Item on suicidal ideation in self-report depression severity questionnaire (scored 0-3)                                                                                                                                                        | Suicidal ideation in the past two weeks for BDI-II, past week for BDI-I | NA                                                                                                                                                                                                                                              | NA                                                                                                                                                                                                                                                                                                                                                                                                                                      | 40% of adolescents who scored 2 or 3 on the BDI suicide ideation item still reported significant suicidal ideation (a score of 2 or 3) when retested 4-6-weeks later (Larsson et al., 1991)<br>In a sample with clinically suicidal young adults, the 6-month test-retest correlation for the BDI suicide item was .35 (Rudd et al., 1996) |
| Scale for Suicidal Ideation (SSI) (interviewer-administered) & Beck Scale for Suicidal Ideation (BSSI) (self-report); (Beck et al., 1988; Beck et al., 1979) | 19 item clinician-rated semi-structured interview (SSI) or self-report questionnaire (BSSI) about intensity of (active or passive) ideation and intent to end life by suicide (all items are scored 0-2). An additional 2 items are not scored | Suicidal ideation in the past week                                      | Interrater reliability for the SSI ranges between .83-.89 (Beck et al., 1979, 1997) Intra-class correlation for the SSI was .97 (Parris et al., 2018)                                                                                           | Cronbach's alpha: .84 - .97 (Beck et al., 1988; Beck et al., 1979, 1997; Hom et al., 2019; Pinninti et al., 2002)<br>Cronbach's alpha varied between .75 and .96 for translated versions (Ayub, 2008; Li et al., 2019; Zhang & Brown, 2007; Zhang & Norvilitis, 2002). In a large sample of outpatients, the internal consistency was omega=.91 (Gallyer et al., 2020). In a veteran sample, the alpha was .95 (Gutierrez et al., 2019) | Three month test-retest reliability was .74 (Chioqueta & Stiles, 2006).<br>One-week test-retest reliability was $r = .88$ (Pinninti et al., 2002) and $r = .54$ (Beck, 1991)                                                                                                                                                               |
| Children's Depression Rating Scale Revised (CDRS-R) suicide item (Poznanski & Mokros, 1996)                                                                  | Clinician-rated interview to assess depression severity in children, based on the Hamilton Depression Rating Scale and includes 17 items. Includes one item on suicidal ideation and attempt (scored 1-7)                                      | Suicidal ideation and suicidal behaviour in the past week               | Acceptable interrater reliability was observed for the suicide index ( $K = .74$ ) (Cowles, 2006) Interrater reliability for the suicide ideation scale was $\kappa = .65$ in both clinical and non-clinical samples (Poznanski & Mokros, 1996) | NA                                                                                                                                                                                                                                                                                                                                                                                                                                      | NA                                                                                                                                                                                                                                                                                                                                         |

|                                                                                   |                                                                                                                                                                                                                                                     |                                                                                            |                                                                                                                                                                                                                                                                                                                                                                                                                                                                                                                                                                                                                                                                                                                                                                                                                                                                                       |                                                                                                                                                                                                                                                                                                                                                                                                                                                                                                                                                                                                                                                                                                                                                                                                                                                                                                                                                                                                                                                                                                                                                                                                                                                                                                                           |    |
|-----------------------------------------------------------------------------------|-----------------------------------------------------------------------------------------------------------------------------------------------------------------------------------------------------------------------------------------------------|--------------------------------------------------------------------------------------------|---------------------------------------------------------------------------------------------------------------------------------------------------------------------------------------------------------------------------------------------------------------------------------------------------------------------------------------------------------------------------------------------------------------------------------------------------------------------------------------------------------------------------------------------------------------------------------------------------------------------------------------------------------------------------------------------------------------------------------------------------------------------------------------------------------------------------------------------------------------------------------------|---------------------------------------------------------------------------------------------------------------------------------------------------------------------------------------------------------------------------------------------------------------------------------------------------------------------------------------------------------------------------------------------------------------------------------------------------------------------------------------------------------------------------------------------------------------------------------------------------------------------------------------------------------------------------------------------------------------------------------------------------------------------------------------------------------------------------------------------------------------------------------------------------------------------------------------------------------------------------------------------------------------------------------------------------------------------------------------------------------------------------------------------------------------------------------------------------------------------------------------------------------------------------------------------------------------------------|----|
| Composite International Diagnostic Interview (CIDI) suicide questions (WHO, 1997) | Suicidal ideation, plans, and behaviour are assessed in the major depressive disorder module of the CIDI                                                                                                                                            | Lifetime suicidal ideation and behaviour                                                   | NA                                                                                                                                                                                                                                                                                                                                                                                                                                                                                                                                                                                                                                                                                                                                                                                                                                                                                    | NA                                                                                                                                                                                                                                                                                                                                                                                                                                                                                                                                                                                                                                                                                                                                                                                                                                                                                                                                                                                                                                                                                                                                                                                                                                                                                                                        | NA |
| Columbia-Suicide Severity Rating Scale (C-SSRS) (Posner et al., 2011)             | Semi-structured interview to assess recent and lifetime suicidal ideation and suicidal behaviour, including severity and intensity of ideation and lethality of attempt. The intensity and severity scales are scored on a five-point ordinal scale | Recent and lifetime suicidal ideation, suicidal behaviour, including lethality of attempts | Interrater reliability: weighted kappa of .92 and .88 for recent and lifetime most severe ideation respectively in a Turkish sample (Kilincaslan et al., 2019). Kappa was .75 for lifetime attempt, 1 for lifetime ideation, .84 for suicidal ideation in the past month and .52 for attempt in the past month in a sample of inpatients (Youngstrom et al., 2015). The weighted kappa for suicidal behaviour ranged from .70-.90 (Lindh et al., 2018). ICC=.09 for suicidal ideation, and 100% agreement for suicidal behaviour in adolescent sample (Brent et al., 2009); k=.88 for distinguishing actual, aborted, preparatory acts and other acts in adolescent sample (Kerr et al., 2014); Kappa was .94 for passive and active suicidal ideation, 1.00 for actual suicide attempt and any suicidal behaviour, but lower for interrupted attempt (.48) and aborted attempt (.89) | Cronbach's alpha: In the original study by Posner et al., 2011 Cronbach's alpha was between .73 and .93 (Posner et al., 2011) Alpha was .87 for ideation subscale, .73 suicide intensity scale, .89 for severity subscale and .91 for behaviour subscale in Spanish adolescents (Serrani Azcurra, 2017). In a Spanish clinical sample, Cronbach's alpha was .53 for the intensity subscale (Al-Halabí et al., 2016). Cronbach's alpha was .89 and .91 for a recent and lifetime C-SSRS score in a Turkish sample (Kilincaslan et al., 2019), .95 in an inpatient sample (Madan et al., 2016). Alpha was .53 for lifetime scores and .50 for past month in a sample of inpatients (Youngstrom et al., 2015) and .64 for the five initial questions in a sample of adult psychiatric patients (Lindh et al., 2018). In a sample of emergency department patients with suicidal ideation and/or attempt, alpha was .83 for the ideation subscale, and .76 for all items, but poorer for the intensity of ideation and suicidal behaviour subscale (both .42) (Brown et al., 2020). In a sample of veterans, alpha for the intensity subscale was .63 (Hom et al., 2019). In a veteran sample, alpha for the severity subscale was .77 for the severity subscale and 0.64 for the intensity subscale (Gutierrez et al., 2019) | NA |

| (Mundt et al., 2010)                                                                                                                |                                                                                                                                   |                                                                    |                                                                                                                             |                                                                                                                                                                                                                                                                     |                                                                                                                             |
|-------------------------------------------------------------------------------------------------------------------------------------|-----------------------------------------------------------------------------------------------------------------------------------|--------------------------------------------------------------------|-----------------------------------------------------------------------------------------------------------------------------|---------------------------------------------------------------------------------------------------------------------------------------------------------------------------------------------------------------------------------------------------------------------|-----------------------------------------------------------------------------------------------------------------------------|
| Diagnostic Interview for Genetic Studies (DIGS) suicide items (Nurnberger et al., 1994)                                             | Diagnostic interview which includes items about lifetime suicidal ideation and suicidal behaviour                                 | Lifetime suicidal ideation and behaviour                           | The inter-rater agreement on suicidal behaviour using a Portuguese translation of the DIGS was 96.4% (Azevedo et al., 1993) | NA                                                                                                                                                                                                                                                                  | NA                                                                                                                          |
| Hamilton Depression Rating Scale (HDRS) suicide item (Hamilton, 1960)                                                               | Clinician-rated scale with one item on suicidal ideation and attempt, which is scored from 0 (no ideation) to 4 (suicide attempt) | Suicidal ideation and behaviour in the past week                   | Inter-rater reliability: .95 (Potts et al., 1990) and .90 (Morriss et al., 2008)                                            | NA                                                                                                                                                                                                                                                                  | Test-retest reliability in a three day period is $r = .64$ (Williams, 1988)                                                 |
| Inventory of Depression and Anxiety Symptoms (IDAS-II) - Suicide Subscale (Watson et al., 2012)                                     | Questionnaire to assess depressive and anxiety symptoms that includes 6 items on suicidal ideation and behaviour (scored 1-5)     | Suicidal ideation and behaviour in the past two weeks              | NA                                                                                                                          | Cronbach's alpha for the suicidality scale range between .79 and .86 in young adults, high school students, college student and patients (Watson et al., 2012) In a large community sample, Cronbach's alpha for the suicide subscale was .77 (Capron et al., 2012) | Test-retest reliability in patients was .77 for the IDAS-I suicidality scale for a 1-week time period (Watson et al., 2007) |
| Inventory of Depressive Symptomatology (IDS) & Quick Inventory of Depressive Symptomatology (QIDS) suicide item (Rush et al., 1986) | Depressive symptom severity questionnaire that includes one item on suicidal ideation and/or behaviour (scored 0-3)               | Suicidal ideation and behaviour in the past week                   | NA                                                                                                                          | NA                                                                                                                                                                                                                                                                  | NA                                                                                                                          |
| Kiddie Schedule for Affective Disorders and Schizophrenia (K-SADS) suicide items (Kaufman et al., 1997)                             | Semi-structured diagnostic interview with five questions in the MDD module around ideation, suicidal behaviour and non-suicidal   | Lifetime suicidal ideation and behaviour, non-suicidal self-injury | Interrater reliability: $k = .9$ for ideation, .83 for attempt and .71 for NSSI (Nock et al., 2007)                         | NA                                                                                                                                                                                                                                                                  | NA                                                                                                                          |

| self-injury<br>(scored 0-3)                                                                                                                  |                                                                                                                                                                                                                               |                                                                                                                |                                                                                                                                                                                                                                                                                                                                          |                                                                                                                                                  |    |
|----------------------------------------------------------------------------------------------------------------------------------------------|-------------------------------------------------------------------------------------------------------------------------------------------------------------------------------------------------------------------------------|----------------------------------------------------------------------------------------------------------------|------------------------------------------------------------------------------------------------------------------------------------------------------------------------------------------------------------------------------------------------------------------------------------------------------------------------------------------|--------------------------------------------------------------------------------------------------------------------------------------------------|----|
| Montgomery<br>–Åsberg<br>Depression<br>Rating Scale<br>(MADRS)<br>suicide item<br>(Montgomery<br>& Åsberg,<br>1979)                          | Clinician-administered<br>depressive<br>symptom<br>severity<br>assessment,<br>with one item<br>on suicidal<br>ideation<br>(scored 0-6)                                                                                        | Suicidal<br>ideation in<br>the past<br>week                                                                    | Interrater<br>reliability:<br>spearman<br>correlation=.63<br>(Davidson et al.,<br>1986) ICC ranged<br>between 0.95 and<br>0.99 for three and<br>two raters<br>respectively on a<br>Japanese version<br>of the MADRS<br>(Takahashi et al.,<br>2004) ICCs were<br>lower than 0.60 in<br>three different<br>samples (Maier et<br>al., 1988) | Cronbach's alpha for the<br>suicide item was .65 in a<br>sample of people with<br>schizophrenia spectrum<br>disorders<br>(Herniman et al., 2021) | NA |
| Mini<br>International<br>Neuropsychiatric<br>Interview<br>(MINI)<br>suicidality<br>module<br>(Sheehan et<br>al., 1998)                       | Diagnostic<br>interview<br>which<br>includes 9<br>items around<br>suicidal<br>ideation,<br>self-harm and<br>suicidal<br>behaviour<br>(scored<br>yes/no)                                                                       | Suicidal<br>ideation<br>and<br>behaviour,<br>non-suicidal<br>self-injury<br>in the past<br>month &<br>lifetime | NA                                                                                                                                                                                                                                                                                                                                       | NA                                                                                                                                               | NA |
| Revised<br>Children's<br>Anxiety and<br>Depression<br>Scale<br>(RCADS)<br>suicide item<br>(Chorpita et<br>al., 2000)                         | Questionnaire to assess<br>severity of<br>depressive<br>and anxiety<br>symptoms in<br>children,<br>which<br>includes one<br>item on<br>frequency of<br>thoughts<br>about death<br>(scored on a<br>four-point<br>likert scale) | Lifetime<br>suicidal<br>ideation                                                                               | NA                                                                                                                                                                                                                                                                                                                                       | NA                                                                                                                                               | NA |
| Structured<br>Clinical<br>Interview for<br>DSM<br>Disorders<br>(SCID)<br>Mood<br>Disorder<br>Module<br>Suicide<br>Questions<br>(First, 1997) | Structured<br>clinical<br>interview that<br>includes<br>items on<br>suicidal<br>ideation,<br>suicide plans<br>and suicidal<br>behaviour<br>during                                                                             | Lifetime<br>suicidal<br>ideation<br>and<br>behaviour                                                           | NA                                                                                                                                                                                                                                                                                                                                       | NA                                                                                                                                               | NA |

|                                                                           |                                                                                                                                                                                                                           |                                                                                                     |                                                                                                                                                                                                                                                                                                                                                            |                                                                                                                                                                                                                                                                                                                                                                                                                                     |                                                                                                                                                                                                                                                         |
|---------------------------------------------------------------------------|---------------------------------------------------------------------------------------------------------------------------------------------------------------------------------------------------------------------------|-----------------------------------------------------------------------------------------------------|------------------------------------------------------------------------------------------------------------------------------------------------------------------------------------------------------------------------------------------------------------------------------------------------------------------------------------------------------------|-------------------------------------------------------------------------------------------------------------------------------------------------------------------------------------------------------------------------------------------------------------------------------------------------------------------------------------------------------------------------------------------------------------------------------------|---------------------------------------------------------------------------------------------------------------------------------------------------------------------------------------------------------------------------------------------------------|
|                                                                           |                                                                                                                                                                                                                           | depressive episodes (scored 1-3)                                                                    |                                                                                                                                                                                                                                                                                                                                                            |                                                                                                                                                                                                                                                                                                                                                                                                                                     |                                                                                                                                                                                                                                                         |
| Suicidal Ideation Questionnaire (SIQ) (Reynolds, 1987)                    | 30-item self-report questionnaire to assess suicidal ideation in adolescents (grades 10-12) (scored 0-6 per item)                                                                                                         | Lifetime suicidal ideation                                                                          | NA                                                                                                                                                                                                                                                                                                                                                         | Cronbach's alpha: .97 in the original clinical adolescent sample (Reynolds, 1987). Cronbach's alpha was .975 for a Chinese version in adolescents (Zhang et al., 2014), .95 for Kuwaiti students and .96 for American students (Abdel-Khalek & Lester, 2007), .973 in Chinese high school students (Jia et al., 2014), .95 in French adolescents (Potard et al., 2014) and .97 in a clinical adolescent sample (Pinto et al., 1997) | Test retest correlation was .91 for a two-week period in French adolescents (Potard et al., 2014). In a large sample of high school students, the SIQ had a test-retest reliability, over an interval of approximately 4 weeks, of .72 (Reynolds, 1988) |
| Beck's Suicide Intent Scale (SIS) (Beck et al., 1974)                     | Clinician-rated Interview with 15 items to assess the seriousness of previous suicide attempts (scored 0-2). Questions detail the preparation, lethality, expectations and planning. An additional 5 items are not scored | Suicide intent during most recent attempt and attempt with highest lethality                        | Interrater reliability: .81-.95 (Beck et al., 1974; Mieczkowski et al., 1993)                                                                                                                                                                                                                                                                              | Cronbach's alpha: .95 (Beck et al., 1974), and .651 in Chinese samples (Zhang & Jia, 2011). Alpha was .85 in a sample of adolescent suicide attempters (Spirito et al., 1996). Alpha was .84 in a clinical sample (Diaz et al., 2003) and in two samples of adolescents with recent attempts ( $\alpha=.74$ and .79) (Kingsbury, 1993; Nasser & Overholser, 1999)                                                                   | NA                                                                                                                                                                                                                                                      |
| Self-Injury Thoughts and Behaviours Interview (SITBI) (Nock et al., 2007) | Structured interview that includes 169 items on suicidal ideation, plans, gestures, suicidal behaviour and non-suicidal self-injury                                                                                       | Suicidal ideation and behaviour, non-suicidal self-injury during lifetime, past year and past month | Interrater reliability: $k=.99$ (Nock et al., 2007), perfect interrater reliability for ideation, plans, gestures, attempts, NSSI in the previous year and month in a Spanish population (García-Nieto et al., 2013), A German version showed good interrater agreement for NSSI (.77) and perfect agreement for suicidal behaviour (Fischer et al., 2014) | NA                                                                                                                                                                                                                                                                                                                                                                                                                                  | Test retest reliability: $k=.7-1.0$ for suicidal ideation, plan, attempt and NSSI over six months, but poor for suicidal gestures ( $K=.25$ ) (Nock et al., 2007)                                                                                       |

|                                                                       |                                                                                                                                                                                      |                                                                                  |    |                                                                                                                                                                                                                                                                                                                                                                                                                                      |                                                                                                                  |
|-----------------------------------------------------------------------|--------------------------------------------------------------------------------------------------------------------------------------------------------------------------------------|----------------------------------------------------------------------------------|----|--------------------------------------------------------------------------------------------------------------------------------------------------------------------------------------------------------------------------------------------------------------------------------------------------------------------------------------------------------------------------------------------------------------------------------------|------------------------------------------------------------------------------------------------------------------|
| Suicide Score Scale (SSS) (Innamorati, Pompili, Lester, et al., 2008) | 20-item self-report questionnaire to assess suicidal ideation and behaviour                                                                                                          | Suicidal ideation and behaviour during past year and lifetime                    | NA | Cronbach's alpha: .75 for part I (ideation and attempt in last 12 months) and .80 for part II (lifetime ideation and attempt) in undergraduate students (Innamorati, Pompili, Lester, et al., 2008), and .87 in a different student sample (Innamorati, Pompili, Ferrari, et al., 2008)                                                                                                                                              | NA                                                                                                               |
| Youth Self-report suicide item (Achenbach et al., 1991)               | Self-report questionnaire to assess internalizing and externalizing behaviour, which includes an item on suicidal behaviour (deliberate self-harm or suicidal behaviour; scored 0-2) | Suicidal ideation and behaviour, non-suicidal self-injury in the past six months | NA | NA                                                                                                                                                                                                                                                                                                                                                                                                                                   | NA                                                                                                               |
| Suicidal Ideation Questionnaire JR (SIQ-JR) (Reynolds, 1987)          | 15-item self-report version of the SIQ for grade 7-9 (scored 0-6)                                                                                                                    | Lifetime suicidal ideation                                                       |    | Cronbach's alpha: .93, .94, .94 for seventh, eighth, and ninth graders (Reynolds, 1988) .951 for Chinese version in adolescents (Zhang et al., 2014) and ranged between .93-.95 for American adolescents (Huth-Bocks et al., 2007), .92 in a sample of inpatient adolescents (King et al., 2014), and .96 in a sample of American Indian adolescents (Keane et al., 1996) and .91 in inner-city adolescents (Reynolds & Mazza, 1999) | Three-week test-retest reliability was $r = .89$ in inner-city children and adolescents (Reynolds & Mazza, 1999) |

**Supplementary Table 3. Concurrent and predictive validity of items, scales, questionnaires and interviews assessing suicidal thoughts and behaviours**

| Measure | Concurrent validity | Predictive validity |
|---------|---------------------|---------------------|
|---------|---------------------|---------------------|

|                                                                                                                          |                                                                                                                                                                                                                                                                                                                                                                                                                                                                                                                                                                                                                                                                                                                                                                                                                                                                                                                                                                                                                                                                                                                                                                                                                                                                                                                                                                                                                                                                                                                                                                                                                                                                          |                                                                                                                                                                                                                                                                                                                                                                                                                                                                                                                                                                                                                                                                                                                                                                                                                                                                                                             |
|--------------------------------------------------------------------------------------------------------------------------|--------------------------------------------------------------------------------------------------------------------------------------------------------------------------------------------------------------------------------------------------------------------------------------------------------------------------------------------------------------------------------------------------------------------------------------------------------------------------------------------------------------------------------------------------------------------------------------------------------------------------------------------------------------------------------------------------------------------------------------------------------------------------------------------------------------------------------------------------------------------------------------------------------------------------------------------------------------------------------------------------------------------------------------------------------------------------------------------------------------------------------------------------------------------------------------------------------------------------------------------------------------------------------------------------------------------------------------------------------------------------------------------------------------------------------------------------------------------------------------------------------------------------------------------------------------------------------------------------------------------------------------------------------------------------|-------------------------------------------------------------------------------------------------------------------------------------------------------------------------------------------------------------------------------------------------------------------------------------------------------------------------------------------------------------------------------------------------------------------------------------------------------------------------------------------------------------------------------------------------------------------------------------------------------------------------------------------------------------------------------------------------------------------------------------------------------------------------------------------------------------------------------------------------------------------------------------------------------------|
| Beck Depression Inventory item 9                                                                                         | <p>Correlation between BDI suicide item and BSSI was <math>r=.56-.58</math> (Beck, 1991)</p> <p>Correlation was .48 with the first five items of the SSI in hospitalized suicide attempters (Desseilles et al., 2012)</p> <p>Correlation was .68 with the total BSSI score in university students (Chioqueta &amp; Stiles, 2006) and .69 in adolescents (Steer et al., 1993)</p> <p>Correlation with BSI score was .41 in an inpatient sample and .69 in an outpatient sample (Beck et al., 1979)</p> <p>Correlation was .58 with the SSI total score and .53 with the Hamilton Depression Rating Scale item on suicidal ideation (Valtonen et al., 2009)</p> <p>Agreement on presence of ideation between the BDI (score 2 or higher) and Hamilton Depression Rating Scale suicidal ideation item (score 3 or higher) was <math>\kappa=.64</math> in primary care patients, <math>\kappa=.52</math> in outpatient and <math>\kappa=.39</math> in inpatients (Vuorilehto et al., 2014)</p> <p>The BDI suicide item was correlated with the MADRS and HDRS suicide items (<math>r=.65</math> and <math>.69</math>) (Ballard et al., 2015)</p> <p>Correlations between the BDI suicide item and SSI score were <math>r=.69</math> for outpatients and <math>r=.58</math> for inpatients (Beck et al., 1988)</p>                                                                                                                                                                                                                                                                                                                                                            | <p>Participants who scored higher than 2 on the BDI suicidal ideation item, were 6.9 times more likely to commit suicide than those that scored lower (Brown, 2001)</p> <p>BDI item 9 showed good positive predictive value (.53) for suicidal behaviour in six months following the interview, but low sensitivity (.33) (Valtonen et al., 2009)</p> <p>BDI score predicted death by suicide and repeat suicide attempts in an outpatient sample with follow-up between 18 months and 20 years (Green et al., 2015)</p> <p>In a community sample of adolescents, the BDI suicidal ideation item was found to be predictive of both future suicide attempts (OR=6.9) and future depressive episodes (OR=2.1) (Lewinsohn et al., 1994)</p> <p>A non-zero score on the BDI suicidal ideation item predicted death by suicide in an inpatient sample followed for 30 years (OR=2.41) (Wenzel et al., 2011)</p> |
| Scale for Suicidal Ideation (SSI) (interviewer-administered) & Beck Scale for Suicidal Ideation (BSI/BSSI) (self-report) | <p>SSI total scores correlated moderately with BDI suicide item score (<math>r=.58</math>) and Hamilton Depression Rating Scale suicidal ideation item (<math>r=.67</math>) (Valtonen et al., 2009)</p> <p>Agreement on presence of ideation between the SSI sum score (six or higher) and the BDI item 9 (score 2 or higher) was higher in a primary care sample (<math>\kappa=.45</math>), then in outpatients (<math>\kappa=.29</math>) and inpatients (<math>\kappa=.32</math>), while agreement on the presence of ideation between the SSI sum score (six or higher) and HDRS item 3 (score 2 or higher) was highest in outpatients (<math>\kappa=.50</math>), followed by primary care (<math>\kappa=.49</math>) and inpatients (<math>\kappa=.42</math>) (Vuorilehto et al., 2014)</p> <p>Correlation between BSSI scores and the SSI scores was <math>r=.90</math>, and correlation between the BDI suicide item and SSI were .69 for outpatients and <math>r=.58</math> for inpatients (Beck et al., 1988)</p> <p>Agreement on presence of ideation between SITBI and BSSI was <math>K=.59</math> (Nock et al., 2007)</p> <p>The BSSI scores were correlated with the BDI suicide item (<math>r=.69</math>) (Steer et al., 1993)</p> <p>In a sample of veterans, BSSI scores correlated with the C-SSRS ideation severity and intensity scores (<math>r=.24</math> and <math>.21</math> respectively); and 81% of participants reported a history of suicide attempt on both the BSSI and C-SSRS in this sample (Hom et al., 2019)</p> <p>The SSI was correlated with the HDRS suicide item and C-SSRS scores (<math>r&gt;.6</math>) (McCall et al., 2021)</p> | <p>Outpatients with a total score higher than 2 on the SSI, were 7 times more likely to commit suicide than those that scored lower (Brown et al., 2000)</p> <p>In a sample of more than 3000 adult outpatients, those who had a total score higher than 2 on the SSI had 5.42 times higher odds of dying by suicide than under (Beck et al., 1999)</p> <p>In psychiatric outpatients, those that scored 16 or higher on the SSI during their worst ever suicidal ideation, were almost 14 times more likely to die by suicide than those that scored below 16 (Beck et al., 1999)</p>                                                                                                                                                                                                                                                                                                                      |
| Children's Depression Rating Scale (CDRS) suicide item                                                                   | NA                                                                                                                                                                                                                                                                                                                                                                                                                                                                                                                                                                                                                                                                                                                                                                                                                                                                                                                                                                                                                                                                                                                                                                                                                                                                                                                                                                                                                                                                                                                                                                                                                                                                       | A suicide index composed of the sum of responses to five measures of suicidality (including the CDRS suicidal ideation item) was moderately associated with suicidal ideation one year later ( $r=.39$ )                                                                                                                                                                                                                                                                                                                                                                                                                                                                                                                                                                                                                                                                                                    |



| Composite International Diagnostic Interview (CIDI) suicide questions | NA                                                                                                                                                                                                                                                                                                                                                                                                                                                                                                                                                                                                                                                                                                                                                                                                                                                                                                                                                                                                                                                                                                                                                                                                                                                                                                                                                                                                                                                                                                                                                                                                                                                                                                                                                                                                                                                                                                                                                                                                                                                                                                                                                                                                                                       | NA                                                                                                                                                                                                                                                                                                                                                                                                                                                                                                                                                                                                                                                                                                                                                                                                                                                                                                                                                                                                                                                                                                                                                                                                                                                                                                                                                                                                                                                                                                                                                                                                                                                                                                                                                                                                                                                                                                                                                                                                                                                                                                                                                                                                                                                                                                                                                                                                                                                                                                                                                                                                                  |
|-----------------------------------------------------------------------|------------------------------------------------------------------------------------------------------------------------------------------------------------------------------------------------------------------------------------------------------------------------------------------------------------------------------------------------------------------------------------------------------------------------------------------------------------------------------------------------------------------------------------------------------------------------------------------------------------------------------------------------------------------------------------------------------------------------------------------------------------------------------------------------------------------------------------------------------------------------------------------------------------------------------------------------------------------------------------------------------------------------------------------------------------------------------------------------------------------------------------------------------------------------------------------------------------------------------------------------------------------------------------------------------------------------------------------------------------------------------------------------------------------------------------------------------------------------------------------------------------------------------------------------------------------------------------------------------------------------------------------------------------------------------------------------------------------------------------------------------------------------------------------------------------------------------------------------------------------------------------------------------------------------------------------------------------------------------------------------------------------------------------------------------------------------------------------------------------------------------------------------------------------------------------------------------------------------------------------|---------------------------------------------------------------------------------------------------------------------------------------------------------------------------------------------------------------------------------------------------------------------------------------------------------------------------------------------------------------------------------------------------------------------------------------------------------------------------------------------------------------------------------------------------------------------------------------------------------------------------------------------------------------------------------------------------------------------------------------------------------------------------------------------------------------------------------------------------------------------------------------------------------------------------------------------------------------------------------------------------------------------------------------------------------------------------------------------------------------------------------------------------------------------------------------------------------------------------------------------------------------------------------------------------------------------------------------------------------------------------------------------------------------------------------------------------------------------------------------------------------------------------------------------------------------------------------------------------------------------------------------------------------------------------------------------------------------------------------------------------------------------------------------------------------------------------------------------------------------------------------------------------------------------------------------------------------------------------------------------------------------------------------------------------------------------------------------------------------------------------------------------------------------------------------------------------------------------------------------------------------------------------------------------------------------------------------------------------------------------------------------------------------------------------------------------------------------------------------------------------------------------------------------------------------------------------------------------------------------------|
| Columbia-Suicide Severity Rating Scale (C-SSRS)                       | <p>C-SSRS severity scores were correlated with the HDRS suicide item (<math>r=.56</math>) and with Beck Suicide Intent Scale scores in those with suicide attempt (<math>r=.22</math>) (Al-Halabi et al., 2016)</p> <p>C-SSRS severity scores and intensity scores were also correlated with SSI worst-point scores (<math>r=.52</math> and <math>r=.56</math> respectively) (Posner et al., 2011)</p> <p>The C-SSRS severity scores were correlated with the MADRS suicide item (<math>r=.63</math>) and the BDI suicide item (<math>r=.80</math>), while the intensity scores were also correlated with the MADRS item (<math>r=.69</math>) and BDI item (<math>r=.51</math>) (Posner et al., 2011)</p> <p>There were modest correlations between the C-SSRS severity scale and SIQ-JR total score (<math>r=.36</math>) and between C-SSRS intensity subscale and SIQ-JR total score (<math>r=.23</math>) (Posner et al., 2011)</p> <p>The correlation between C-SSRS severity and SSI total scores were moderate (<math>r=.69</math>), the correlation between C-SSRS intensity subscale scores and SSI total scores was modest (<math>r=.34</math>) (Posner et al., 2011)</p> <p>C-SSRS scores were associated with SSI scores (<math>r=.71</math>) and KSADS ideation item (<math>r=.87</math>) in Spanish adolescents (Serrani Azcurra, 2017)</p> <p>The total C-SSRS score was correlated with the BSSI score (<math>r=.477</math>) in an inpatient sample (Madan et al., 2016)</p> <p>In a sample of veterans, the severity and ideation subscale were moderately correlated with the SSI total score (<math>r=.50</math> and <math>.52</math>) (Matarazzo et al., 2019)</p> <p>Agreement between the MINI and C-SSRS for lifetime suicidal behaviour (<math>k=.97</math>) (Hesdorffer et al., 2013)</p> <p>In a sample of veterans, C-SSRS ideation severity and intensity scores correlated with BSSI scores (<math>r=.24</math> and <math>.21</math> respectively) and 81% of participants reported a history of suicide attempt on both the BSSI and C-SSRS in this sample (Hom et al., 2019)</p> <p>The C-SSRS was correlated with the BSSI and suicide item from the HDRS (<math>r&gt;.6</math>) (McCall et al., 2021)</p> | <p>(Garber et al., 1998)</p> <p>Score on the CDRS-R suicidal ideation item was not related to suicidal behaviour during 36-week treatment in adolescents (Vitiello et al., 2009)</p> <p>C-SSRS intensity scale score predicted suicide attempt at one-year follow-up in adolescents (OR=1.09). Duration of ideation was a predictor of suicide attempt at follow-up (OR=1.80) (Gipson et al., 2015)</p> <p>Baseline C-SSRS severity scores based on worst-point lifetime ideation were significantly predictors of suicide attempt in the following six months (OR=1.45) (Posner et al., 2011)</p> <p>In adolescents, suicide attempt reported at baseline predicted suicidal behaviour at follow-up three months later (OR=4.03), but severity and intensity of suicidal ideation at baseline did not predict future attempt over and above baseline attempt (Conway et al., 2017)</p> <p>The C-SSRS total score was associated with suicidal behaviour in the six months following hospitalization (<math>r</math> between <math>.239</math> and <math>.289</math>) (Madan et al., 2016)</p> <p>C-SSRS total score and intensity score predicted a suicide attempt in the following six months (OR=1.08 and 1.1 respectively) in an adult sample with psychiatric illness (Lindh et al., 2018)</p> <p>In a veteran sample, baseline intensity subscale and severity subscale scores predicted attempt at 6 months (OR between 1.19-3.23) (Matarazzo et al., 2019)</p> <p>Severity of ideation and history of suicide attempt predicted suicide attempt in the next 18 months in young people (OR=1.51 and 4.80 respectively), in ideators intensity and frequency of ideation predicted suicide attempt (OR=1.15 and 1.54 respectively) (Horwitz et al., 2015)</p> <p>Suicidal ideation and suicidal behaviour reported on the electronic version of the C-SSRS predicted suicide attempt in psychiatric and non-psychiatric patients (Greist et al., 2014)</p> <p>Current and worst-ever severity of ideation predicted future suicidal behaviour 12 months after visiting an emergency department for suicide risk (Arias et al., 2016)</p> <p>The C-SSRS suicidal ideation and suicidal behaviour subscales predicted subsequent suicide attempt in the following year (OR=1.07-1.19) in a sample of participants with suicidal thoughts and/or behaviour that visited an emergency department (Brown et al., 2020)</p> <p>In a sample of veterans, Ideation, plan/intent and suicidal behaviour determined using the C-SSRS predicted suicide attempts in the subsequent three months (Katz et al., 2020)</p> |

| Diagnostic Interview for Genetic Studies (DIGS) suicide items                    | NA                                                                                                                                                                                                                                                                                                                                                                                                                                                                                                                                                                                                                                                                                                                                                                                                                                                                                                                                                                                                                                                                                                                                                                                                                                                                                | NA                                                                                                                                                                                     |
|----------------------------------------------------------------------------------|-----------------------------------------------------------------------------------------------------------------------------------------------------------------------------------------------------------------------------------------------------------------------------------------------------------------------------------------------------------------------------------------------------------------------------------------------------------------------------------------------------------------------------------------------------------------------------------------------------------------------------------------------------------------------------------------------------------------------------------------------------------------------------------------------------------------------------------------------------------------------------------------------------------------------------------------------------------------------------------------------------------------------------------------------------------------------------------------------------------------------------------------------------------------------------------------------------------------------------------------------------------------------------------|----------------------------------------------------------------------------------------------------------------------------------------------------------------------------------------|
| Hamilton Depression Rating Scale (HDRS) (interviewer-administered) suicide item  | <p>The HDRS suicide item was correlated with the first five items of the SSI (<math>r=.40</math>) (Desseilles et al., 2012)</p> <p>HDRS item 3 was correlated with C-SSRS severity score in a Spanish sample (<math>r=.56</math>) (Al-Halabi et al., 2016)</p> <p>HDRS and MADRS suicide items were strongly correlated in a ketamine trial for treatment-resistant major depressive disorder (<math>r=.86</math>) (Ballard et al., 2015)</p> <p>HDRS suicide item scores were moderately associated with BDI suicide item scores (<math>r=.53</math>), and total SSI scores (<math>r=.67</math>) (Valtonen et al., 2009)</p> <p>When using a cut-off, agreement between the SSI (6 or higher) and HDRS suicide item (2 or higher) was stronger (<math>\kappa=.70</math>) than agreement between SSI (6 or higher) and BDI (2 or higher) (<math>\kappa=.15</math>) (Valtonen et al., 2009)</p> <p>There was a strong concordance between SCID suicide items and HDRS suicide item in older participants (<math>r=.94</math>) (Heisel et al., 2010)</p> <p>The agreement between QIDS and HDRS was 76% (<math>\kappa=.40</math>) (Rucci et al., 2011)</p> <p>The HDRS suicide item was correlated with the BSSI and C-SSRS scores (<math>r&gt;.6</math>) (McCall et al., 2021)</p> | Participants who score 2 or higher were 4.9 times more likely to die by suicide than those that scored lower (Brown, 2001)                                                             |
| Inventory of Depression and Anxiety Symptoms (IDAS) - Suicide Subscale           | The IDAS suicidality scale was significantly correlated with the suicidality items from the Interview for Mood and Anxiety Symptoms ( $r=.62$ ) (Watson et al., 2007)                                                                                                                                                                                                                                                                                                                                                                                                                                                                                                                                                                                                                                                                                                                                                                                                                                                                                                                                                                                                                                                                                                             | NA                                                                                                                                                                                     |
| Kiddie Schedule for Affective Disorders and Schizophrenia (K-SADS) suicide items | <p>When the KSADS suicide items were used to categorize patients, the Beck SSI scores significantly differed between all five classes (Holi et al., 2005)</p> <p>The KSADS suicide items correlated with the SSI (<math>r=.52</math>) and SIS scores (<math>r=.76</math>) (Nock &amp; Kazdin, 2002)</p> <p>Good agreement between SITBI and KSADS on presence of suicide attempt (<math>K=.65</math>), and NSSI (<math>K=.74</math>), but lower agreement on ideation (<math>K=.48</math>) (Nock et al., 2007)</p>                                                                                                                                                                                                                                                                                                                                                                                                                                                                                                                                                                                                                                                                                                                                                                | Higher suicidal ideation at baseline on the K-SADS in adolescents was associated with suicide attempt in young adulthood in girls ( $OR=8.81$ ), but not boys (Lewinsohn et al., 2001) |
| Montgomery-Åsberg Depression Rating Scale (MADRS) suicide item                   | The MADRS suicide item score correlated with the first five items of the SSI $r=.62$ , BDI suicide item $r=.45$ , HDRS suicide item $r=.71$ and SSI total score $r=.53$ (Ballard et al., 2015)                                                                                                                                                                                                                                                                                                                                                                                                                                                                                                                                                                                                                                                                                                                                                                                                                                                                                                                                                                                                                                                                                    | NA                                                                                                                                                                                     |
| Mini International Neuropsychiatric Interview                                    | Agreement between MINI suicide items and QIDS item was 83.5% (weighted kappa: .30) in MDD and 83.1% (weighted kappa: .43) in BD (Gao et al., 2015)                                                                                                                                                                                                                                                                                                                                                                                                                                                                                                                                                                                                                                                                                                                                                                                                                                                                                                                                                                                                                                                                                                                                | The shorter 6-item version of the MINI suicide scale significantly predicted suicidal behaviour, but not NSSI 3 and 12 months after discharge                                          |

|                                                                                               |                                                                                                                                                                                                                                                                                                                                                                                                                                                                                                                                                                                                        |                                                                                                                                                                                                                                                                                                                                                                                                                                                                                                                                                                                                                                                                                                                                                                                                                                                |
|-----------------------------------------------------------------------------------------------|--------------------------------------------------------------------------------------------------------------------------------------------------------------------------------------------------------------------------------------------------------------------------------------------------------------------------------------------------------------------------------------------------------------------------------------------------------------------------------------------------------------------------------------------------------------------------------------------------------|------------------------------------------------------------------------------------------------------------------------------------------------------------------------------------------------------------------------------------------------------------------------------------------------------------------------------------------------------------------------------------------------------------------------------------------------------------------------------------------------------------------------------------------------------------------------------------------------------------------------------------------------------------------------------------------------------------------------------------------------------------------------------------------------------------------------------------------------|
| (MINI) suicidality module                                                                     | There was a significant correlation between C-SSRS scores and the suicidality score from the MINI-KID (Children and adolescent version of the MINI) ( $r=.94$ ) in a Turkish adolescent sample (Kilincaslan et al., 2019)                                                                                                                                                                                                                                                                                                                                                                              | (OR=3.1-8.2 for the different items) in psychiatric patients (Roaldset et al., 2012)<br>Suicidality subscale scores predicted suicide attempt at two-year follow-up in homeless people with mental illness (Log OR=1.08) (Katz et al., 2019)                                                                                                                                                                                                                                                                                                                                                                                                                                                                                                                                                                                                   |
| Quick Inventory of Depressive Symptomatology (QIDS) suicide item                              | Agreement between MINI suicide items and QIDS item was 83.5% (weighted kappa: .30) in MDD and 83.1% (weighted kappa: .43) in BD (Gao et al., 2015)<br>The agreement between QIDS and HDRS suicide items was 76% (kappa=.40) (Rucci et al., 2011)                                                                                                                                                                                                                                                                                                                                                       | NA                                                                                                                                                                                                                                                                                                                                                                                                                                                                                                                                                                                                                                                                                                                                                                                                                                             |
| Revised Children's Anxiety and Depression Scale (RCADS) suicide item                          | NA                                                                                                                                                                                                                                                                                                                                                                                                                                                                                                                                                                                                     | NA                                                                                                                                                                                                                                                                                                                                                                                                                                                                                                                                                                                                                                                                                                                                                                                                                                             |
| Structured Clinical Interview for DSM Disorders (SCID) Mood Disorder Module Suicide Questions | Strong concordance between SCID suicide items and HDRS suicide item in older participants ( $r=.94$ ) (Heisel et al., 2010)                                                                                                                                                                                                                                                                                                                                                                                                                                                                            | NA                                                                                                                                                                                                                                                                                                                                                                                                                                                                                                                                                                                                                                                                                                                                                                                                                                             |
| Suicidal Ideation Questionnaire (SIQ)                                                         | The SIQ scores were correlated with the SIS scores in adolescents ( $r=.26$ ) (Spirito et al., 1996)                                                                                                                                                                                                                                                                                                                                                                                                                                                                                                   | NA                                                                                                                                                                                                                                                                                                                                                                                                                                                                                                                                                                                                                                                                                                                                                                                                                                             |
| Beck's Suicide Intent Scale (SIS)                                                             | SIS scores were positively correlated with C-SSRS severity scale scores in a Spanish outpatient sample ( $r=.22$ ) (Al-Halabí et al., 2016)<br>Negative association with SIQ ( $r=-.39$ ) (Levy et al., 1995)<br>Correlations between the SIS and SSI were $r=.73$ and $r=.76$ in prisoners and young adolescents respectively (Lohner & Konrad, 2006; Nock & Kazdin, 2002)<br>SIS scores were correlated with scores from the KSADS in children and young adolescents ( $r=.72$ ) (Nock & Kazdin, 2002)<br>SIS total scores correlated with the SIQ ( $r=.26$ ) in adolescents (Spirito et al., 1996) | SIS did not predict suicide 5-10 years later (Beck et al., 1989)<br>SIS did not predict suicide 1.5-4 years later (Hjelmeland et al., 1998)<br>SIS predicted suicide 12 years later in a Finnish sample (OR=1.2) (Suominen et al., 2004)<br>SIS score above 19 predicted suicide at follow up (median 6 years later) in women only (Skogman et al., 2004)<br>SIS did not predict suicidal behaviour in psychiatric patients in the following 10 years (Tejedor et al., 1999)<br>SIS scores predicted death by suicide at follow-up (mean follow-up 5.2 years later), but the positive predictive value of the SIS was low (4%) (Harriss & Hawton, 2005)<br>SIS scores distinguished those who died by suicide at follow-up (mean follow-up 9.5 years later) and those that did not (positive predictive value = 19%) (Stefansson et al., 2012) |
| Self-Injurious Thoughts and Behaviours Interview (SITBI)                                      | Good agreement between SITBI and KSADS on presence of suicide attempt ( $K=.65$ ), and NSSI ( $K=.74$ ), but lower agreement on ideation ( $K=.48$ ) (Nock et al., 2007)<br>Agreement between the Spanish version of the SITBI and the Beck Scale for Suicidal Ideation was $k=.99$ for ideation, suicide plans and suicide                                                                                                                                                                                                                                                                            | NA                                                                                                                                                                                                                                                                                                                                                                                                                                                                                                                                                                                                                                                                                                                                                                                                                                             |

|                                                                                                   |                                                                                                                                                                 |                                                                                                                                                                                                                                                                                                                                                                                                                                                                                                                                                                                       |
|---------------------------------------------------------------------------------------------------|-----------------------------------------------------------------------------------------------------------------------------------------------------------------|---------------------------------------------------------------------------------------------------------------------------------------------------------------------------------------------------------------------------------------------------------------------------------------------------------------------------------------------------------------------------------------------------------------------------------------------------------------------------------------------------------------------------------------------------------------------------------------|
| attempt, but lower ( $k=.78$ ) for suicidal gestures (García-Nieto et al., 2013)                  |                                                                                                                                                                 |                                                                                                                                                                                                                                                                                                                                                                                                                                                                                                                                                                                       |
| Agreement on presence of ideation between SITBI and BSSI was good ( $K=.59$ ) (Nock et al., 2007) |                                                                                                                                                                 |                                                                                                                                                                                                                                                                                                                                                                                                                                                                                                                                                                                       |
| Suicide Score Scale (SSS)                                                                         | Moderate negative correlation with the Reasons for Living Scale ( $r=-.32$ ) and Zung Depression Scale ( $r=-.41$ ) (Innamorati, Pompili, Lester, et al., 2008) | NA                                                                                                                                                                                                                                                                                                                                                                                                                                                                                                                                                                                    |
| Youth Self-report suicide item                                                                    | NA                                                                                                                                                              | A suicide index composed of the sum of responses to five measures of suicidality (including the YSR and the CBCL suicidal ideation/behaviour items) was moderately associated with suicidal ideation one year later ( $r=.39$ ) (Garber et al., 1998)                                                                                                                                                                                                                                                                                                                                 |
| Suicide Ideation Questionnaire JR (SIQ-JR)                                                        | NA                                                                                                                                                              | SIQ-JR predicted suicidal ideation or behaviour 6 months after discharge ( $OR=1.84$ ) and suicide attempt in the follow-up period in inpatient adolescents ( $OR=1.74$ ) (Huth-Bocks et al., 2007) SIQ-JR was a significant predictor of attempt two months later in American Indian Adolescents (Keane et al., 1996)<br>In adolescent inpatients, higher SIQ-JR scores were predictive of suicidal thoughts and behaviour six months after hospitalization (King et al., 1997) SIQ-JR scores predicted suicide attempt one year later in girls, but not in boys (King et al., 2014) |

**Supplementary Table 4. Fit statistics for the common-factor models used for dimensionality reduction**

| Cohort                      | Instrument | CFI   | RMSEA |
|-----------------------------|------------|-------|-------|
| The University of Melbourne | CSSRS      | 0.639 | 0.139 |
| The University of Melbourne | SIQ        | 0.787 | 0.112 |
| San Raffaele Hospital       | SSI        | 0.589 | 0.109 |





|           |                                            |                                            |                                            |                                                |
|-----------|--------------------------------------------|--------------------------------------------|--------------------------------------------|------------------------------------------------|
|           | Ncoho<br>rts=1)                            |                                            |                                            |                                                |
| SIQ*      | 0.50<br>(s.d.=<br>0.00;<br>Ncoho<br>rts=1) | 0.22<br>(s.d.=<br>0.00;<br>Ncoho<br>rts=1) | 0.77<br>(s.d.=<br>0.00;<br>Ncoho<br>rts=1) |                                                |
| DIG<br>S* | 0.33<br>(s.d.=<br>0.00;<br>Ncoho<br>rts=1) |                                            |                                            |                                                |
| SSS<br>*  |                                            |                                            | 0.13<br>(s.d.=<br>0.00;<br>Ncoho<br>rts=1) |                                                |
| MINI<br>* |                                            |                                            | 0.13<br>(s.d.=<br>0.00;<br>Ncoho<br>rts=1) |                                                |
| RCA<br>DS |                                            |                                            | 0.48<br>(s.d.=<br>0.00;<br>Ncoho<br>rts=1) | 0.37<br>(s.d.=<br>0.00;<br>Ncoh<br>rts=1)<br>) |
| YSR       |                                            |                                            | 0.48<br>(s.d.=<br>0.00;<br>Ncoho<br>rts=1) | 0.37<br>(s.d.=<br>0.00;<br>Ncoho<br>rts=1)     |
| CDI       |                                            |                                            |                                            | 0.48<br>(s.d.=<br>0.00;<br>Ncoh<br>rts=1)<br>) |

S.d: standard deviation, Ncohorts: number of cohorts

\*: Complex measures

Supplementary Figures



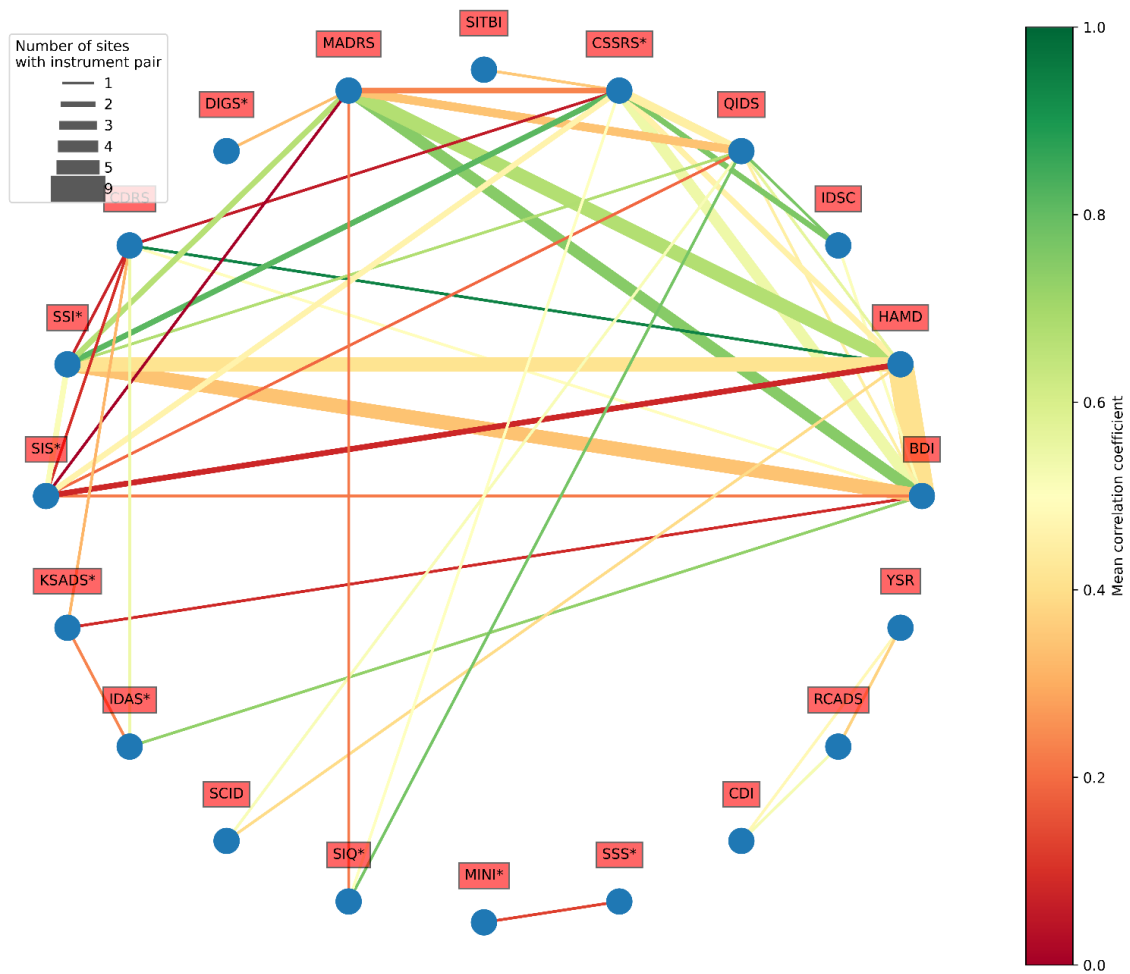

### Supplementary Figure 1 Sensitivity analysis removing protective factors

Same results as in Figure 1b but removing protective factors from C-SSRS and SSI where relevant. Results remained largely unchanged. Each node represents one of the instruments included in the study. Edge color represents the sample-size weighted average correlation coefficient between two instruments. The thickness of the edge increases with the number of cohorts contributing to estimate the correlation. Generally speaking the thicker the edge the more confidence in the correlation estimate.

## Supplementary Figure 2 Construct specific analyses

Undirected acyclic graph shows the results for the meta-analysis of correlations of suicide risk assessment instruments across ENIGMA cohorts for latent factors representing (a); suicide ideation constructs (b); suicide attempt constructs or (c) suicide intent constructs for the complex instruments. Simple instruments were left for comparison and to assess whether they preferably load onto a specific construct. Each node represents one of the instruments included in the study. Each edge color represents the sample-size weighted average correlation coefficient between two instruments. The thickness of the edge increases with the number of cohorts contributing to estimate the correlation. Generally speaking the thicker the edge the more confidence in the correlation estimate.

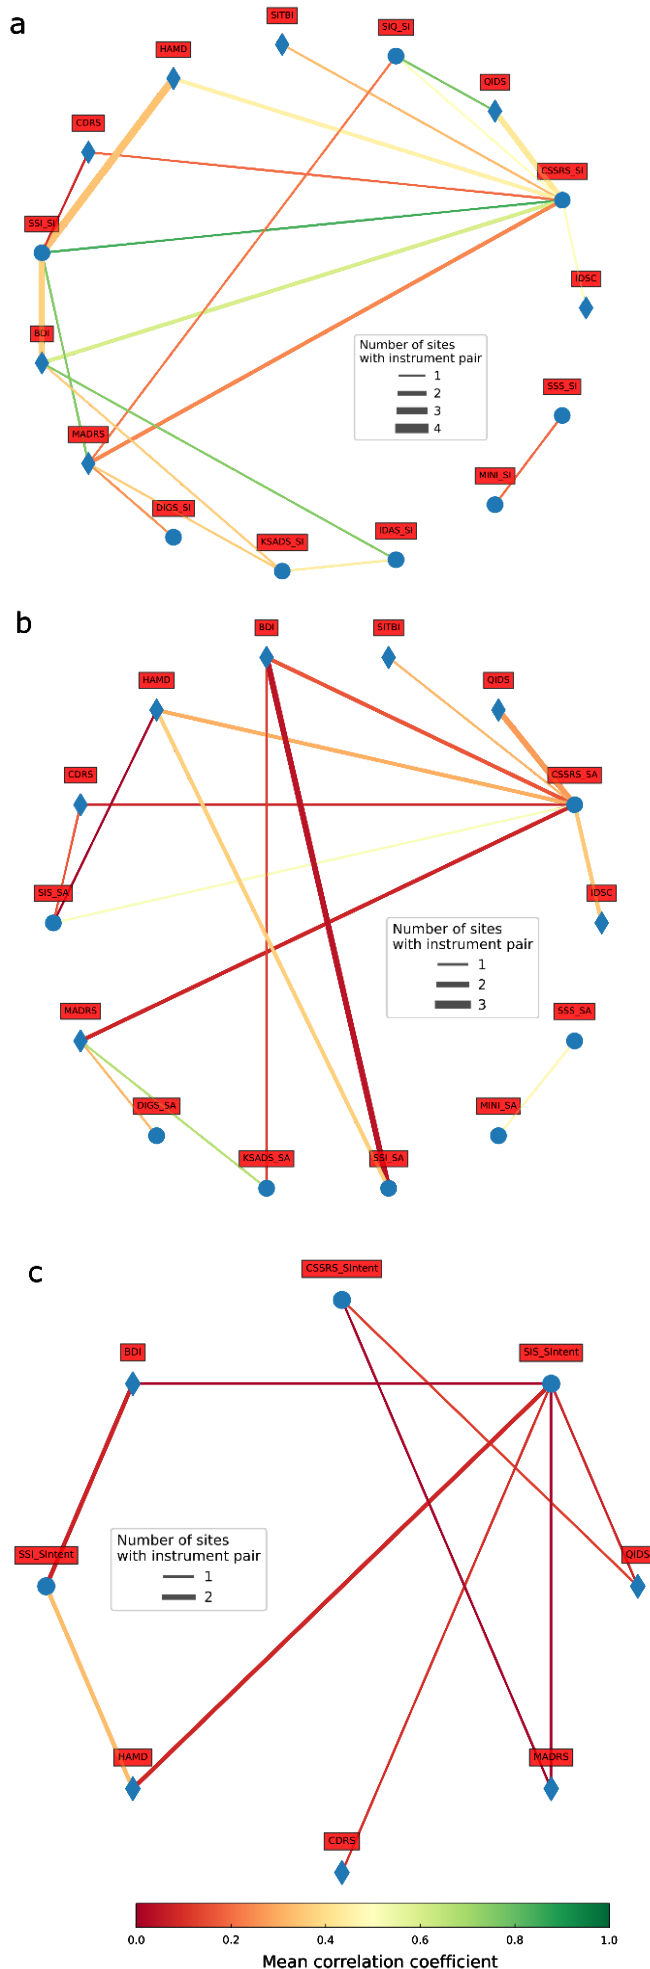

## References

Abdel-Khalek, A., & Lester, D. (2007). The

- psychometric properties and correlates of the Reynolds' suicide ideation questionnaire with Kuwaiti and American students. *Archives of Suicide Research: Official Journal of the International Academy for Suicide Research*, 11(3), 309–319.
- Achenbach, T., Achenbach, T. M., Achenbach, T. M., & Achenbach, T. (1991). *Manual for the youth self-report and 1991 profile*.
- Al-Halabí, S., Sáiz, P. A., Burón, P., Garrido, M., Benabarre, A., Jiménez, E., Cervilla, J., Navarrete, M. I., Díaz-Mesa, E. M., García-Álvarez, L., Muñiz, J., Posner, K., Oquendo, M. A., García-Portilla, M. P., & Bobes, J. (2016). Validation of a Spanish version of the Columbia-Suicide Severity Rating Scale (C-SSRS). *Revista de Psiquiatría Y Salud Mental*, 9(3), 134–142.
- Arias, S. A., Miller, I., Camargo, C. A., Jr, Sullivan, A. F., Goldstein, A. B., Allen, M. H., Manton, A. P., & Boudreaux, E. D. (2016). Factors Associated With Suicide Outcomes 12 Months After Screening Positive for Suicide Risk in the Emergency Department. *Psychiatric Services*, 67(2), 206–213.
- Ayub, N. (2008). Validation of the Urdu translation of the Beck Scale for Suicide Ideation. *Assessment*, 15(3), 287–293.
- Azevedo, M. H., Dourado, A., Valente, J., Macedo, A., Coelho, I., Pato, M., & Pato, C. (1993). The Portuguese-language version of the diagnostic interview for genetic studies. *Psychiatric Genetics*, 3, 189.
- Ballard, E. D., Luckenbaugh, D. A., Richards, E. M., Walls, T. L., Brutsché, N. E., Ameli, R., Niciu, M. J., Vande Voort, J. L., & Zarate, C. A., Jr. (2015). Assessing measures of suicidal ideation in clinical trials with a rapid-acting antidepressant. *Journal of Psychiatric Research*, 68, 68–73.
- Beck, A. T. (1991). *BSI, Beck Scale for Suicide Ideation: Manual*. Psychological Corporation.
- Beck, A. T., Brown, G. K., & Steer, R. A. (1997). Psychometric characteristics of the Scale for Suicide Ideation with psychiatric outpatients. *Behaviour Research and Therapy*, 35(11), 1039–1046.
- Beck, A. T., Brown, G. K., Steer, R. A., Dahlsgaard, K. K., & Grisham, J. R. (1999). Suicide ideation at its worst point: a predictor of eventual suicide in psychiatric outpatients. *Suicide & Life-Threatening Behavior*, 29(1), 1–9.
- Beck, A. T., Kovacs, M., & Weissman, A. (1979). Assessment of suicidal intention: the Scale for Suicide Ideation. *Journal of Consulting and Clinical Psychology*, 47(2), 343–352.
- Beck, A. T., Schuyler, D., & Herman, I. (1974). Development of suicidal intent scales. *The Prediction of Suicide*, 249.
- Beck, A. T., Steer, R. A., Brown, G. K., & Others. (1996). Beck depression inventory-II. *San Antonio*, 78(2), 490–498.
- Beck, A. T., Steer, R. A., & Ranieri, W. F. (1988). Scale for suicide ideation: Psychometric properties of a self-report version. *Journal of Clinical Psychology*, 44(4), 499–505.
- Beck, A. T., Steer, R. A., & Trexler, L. D. (1989). Alcohol abuse and eventual suicide: a 5- to 10-year prospective

- study of alcohol-abusing suicide attempters. *Journal of Studies on Alcohol*, 50(3), 202–209.
- Beck, A. T., Ward, C., Mendelson, M., Mock, J., & Erbaugh, J. (1961). Beck depression inventory (BDI). *Archives of General Psychiatry*, 4(6), 561–571.
- Brent, D. A., Emslie, G. J., Clarke, G. N., Asarnow, J., Spirito, A., Ritz, L., Vitiello, B., Iyengar, S., Birmaher, B., Ryan, N. D., Zelazny, J., Onorato, M., Kennard, B., Mayes, T. L., Debar, L. L., McCracken, J. T., Strober, M., Suddath, R., Leonard, H., ... Keller, M. B. (2009). Predictors of spontaneous and systematically assessed suicidal adverse events in the treatment of SSRI-resistant depression in adolescents (TORDIA) study. *The American Journal of Psychiatry*, 166(4), 418–426.
- Brown, G. K. (2001). *A review of suicide assessment measures for intervention research with adults and older adults*.
- Brown, G. K., Beck, A. T., Steer, R. A., & Grisham, J. R. (2000). Risk factors for suicide in psychiatric outpatients: a 20-year prospective study. *Journal of Consulting and Clinical Psychology*, 68(3), 371–377.
- Brown, L. A., Boudreaux, E. D., Arias, S. A., Miller, I. W., May, A. M., Camargo, C. A., Jr, Bryan, C. J., & Arney, M. F. (2020). C-SSRS performance in emergency department patients at high risk for suicide. *Suicide & Life-Threatening Behavior*, 50(6), 1097–1104.
- Capron, D. W., Blumenthal, H., Medley, A. N., Lewis, S., Feldner, M. T., Zvolensky, M. J., & Schmidt, N. B. (2012). Anxiety sensitivity cognitive concerns predict suicidality among smokers. In *Journal of Affective Disorders* (Vol. 138, Issue 3, pp. 239–246).
- Chioqueta, A. P., & Stiles, T. C. (2006). Psychometric properties of the Beck Scale for Suicide Ideation: a Norwegian study with university students. *Nordic Journal of Psychiatry*, 60(5), 400–404.
- Chorpita, B. F., Yim, L., Moffitt, C., Umemoto, L. A., & Francis, S. E. (2000). Assessment of symptoms of DSM-IV anxiety and depression in children: a revised child anxiety and depression scale. *Behaviour Research and Therapy*, 38(8), 835–855.
- Conway, P. M., Erlangsen, A., Teasdale, T. W., Jakobsen, I. S., & Larsen, K. J. (2017). Predictive Validity of the Columbia-Suicide Severity Rating Scale for Short-Term Suicidal Behavior: A Danish Study of Adolescents at a High Risk of Suicide. *Archives of Suicide Research: Official Journal of the International Academy for Suicide Research*, 21(3), 455–469.
- Cowles, N. (2006). *Prediction of adolescent suicidality: Relative contribution of diagnosis, psychopathy, and impulsivity*.
- Davidson, J., Turnbull, C. D., Strickland, R., Miller, R., & Graves, K. (1986). The Montgomery-Åsberg Depression Scale: reliability and validity. *Acta Psychiatrica Scandinavica*, 73(5), 544–548.
- Desseilles, M., Perroud, N., Guillaume, S., Jaussent, I., Genty, C., Malafosse, A., & Courtet, P. (2012). Is it valid to measure suicidal ideation by depression rating scales? *Journal of Affective Disorders*, 136(3), 398–404.
- Diaz, F. J., Baca-Garcia, E., Diaz-Sastre, C., García Resa, E., Blasco, H., Braquehais Conesa, D., Saiz-Ruiz, J.,

- & de Leon, J. (2003). Dimensions of suicidal behavior according to patient reports. *European Archives of Psychiatry and Clinical Neuroscience*, 253(4), 197–202.
- First, M. B. (1997). *Structured clinical interview for DSM-IV Axis I disorders SCID-I: Clinician version, scoresheet*. American Psychiatric Press.
- Fischer, G., Ameis, N., Parzer, P., Plener, P. L., Groschwitz, R., Vonderlin, E., Kölch, M., Brunner, R., & Kaess, M. (2014). The German version of the self-injurious thoughts and behaviors interview (SITBI-G): a tool to assess non-suicidal self-injury and suicidal behavior disorder. *BMC Psychiatry*, 14, 265.
- Gallyer, A. J., Chu, C., Klein, K. M., Quintana, J., Carlton, C., Dougherty, S. P., & Joiner, T. E. (2020). Routinized categorization of suicide risk into actionable strata: Establishing the validity of an existing suicide risk assessment framework in an outpatient sample. *Journal of Clinical Psychology*, 76(12), 2264–2282.
- Gao, K., Wu, R., Wang, Z., Ren, M., Kemp, D. E., Chan, P. K., Conroy, C. M., Serrano, M. B., Ganocy, S. J., & Calabrese, J. R. (2015). Disagreement between self-reported and clinician-ascertained suicidal ideation and its correlation with depression and anxiety severity in patients with major depressive disorder or bipolar disorder. In *Journal of Psychiatric Research* (Vol. 60, pp. 117–124).
- Garber, J., Little, S., Hilsman, R., & Weaver, K. R. (1998). Family predictors of suicidal symptoms in young adolescents. *Journal of Adolescence*, 21(4), 445–457.
- García-Nieto, R., Blasco-Fontecilla, H., Paz Yepes, M., & Baca-García, E. (2013). Translation and validation of the “Self-Injurious Thoughts and Behaviours Interview” in a Spanish population with suicidal behaviour. *Revista de Psiquiatría Y Salud Mental*, 6(3), 101–108.
- Gipson, P. Y., Agarwala, P., Opperman, K. J., Horwitz, A., & King, C. A. (2015). Columbia-suicide severity rating scale: predictive validity with adolescent psychiatric emergency patients. *Pediatric Emergency Care*, 31(2), 88–94.
- Green, K. L., Brown, G. K., Jager-Hyman, S., Cha, J., Steer, R. A., & Beck, A. T. (2015). The Predictive Validity of the Beck Depression Inventory Suicide Item. *The Journal of Clinical Psychiatry*, 76(12), 1683–1686.
- Greist, J. H., Mundt, J. C., Gwaltney, C. J., Jefferson, J. W., & Posner, K. (2014). Predictive Value of Baseline Electronic Columbia-Suicide Severity Rating Scale (eC-SSRS) Assessments for Identifying Risk of Prospective Reports of Suicidal Behavior During Research Participation. *Innovations in Clinical Neuroscience*, 11(9-10), 23–31.
- Gutierrez, P. M., Joiner, T., Hanson, J., Stanley, I. H., Silva, C., & Rogers, M. L. (2019). Psychometric Properties of Four Commonly Used Suicide Risk Assessment Measures: Applicability to Military Treatment Settings. *Military Behavioral Health*, 7(2), 177–184.
- Hamilton, M. (1960). A rating scale for depression. *Journal of Neurology, Neurosurgery, and Psychiatry*, 23, 56–62.
- Harriss, L., & Hawton, K. (2005). Suicidal intent in deliberate self-harm and the risk of suicide: the predictive

- power of the Suicide Intent Scale. *Journal of Affective Disorders*, 86(2-3), 225–233.
- Heisel, M. J., Duberstein, P. R., Lyness, J. M., & Feldman, M. D. (2010). Screening for suicide ideation among older primary care patients. *Journal of the American Board of Family Medicine: JABFM*, 23(2), 260–269.
- Herniman, S. E., Cotton, S. M., Allott, K. A., Phillips, L. J., Wood, S. J., Liemburg, E., Castelein, S., Veling, W., Bruggeman, R., & Knegtering, H. (2021). The psychometric validity of the Montgomery–Åsberg Depression Rating Scale (MADRS) in recent onset schizophrenia spectrum disorders. *Schizophrenia Research*, 228, 373–381.
- Hesdorffer, D. C., French, J. A., Posner, K., DiVentura, B., Pollard, J. R., Sperling, M. R., Harden, C. L., Krauss, G. L., & Kanner, A. M. (2013). Suicidal ideation and behavior screening in intractable focal epilepsy eligible for drug trials. *Epilepsia*, 54(5), 879–887.
- Hjelmeland, H., Stiles, T. C., Bille-brahe, U., Ostamo, A., Renberg, E. S., & Wasserman, D. (1998). Parasuicide: The value of suicidal intent and various motives as predictors of future suicidal behaviour. *Archives of Suicide Research: Official Journal of the International Academy for Suicide Research*, 4(3), 209–225.
- Holi, M. M., Pelkonen, M., Karlsson, L., Kiviruusu, O., Ruuttu, T., Heilä, H., Tuisku, V., & Marttunen, M. (2005). Psychometric properties and clinical utility of the Scale for Suicidal Ideation (SSI) in adolescents. *BMC Psychiatry*, 5, 8.
- Hom, M. A., Stanley, I. H., Duffy, M. E., Rogers, M. L., Hanson, J. E., Gutierrez, P. M., & Joiner, T. E. (2019). Investigating the reliability of suicide attempt history reporting across five measures: A study of US military service members at risk of suicide. *Journal of Clinical Psychology*, 75(7), 1332–1349.
- Horwitz, A. G., Czyz, E. K., & King, C. A. (2015). Predicting Future Suicide Attempts Among Adolescent and Emerging Adult Psychiatric Emergency Patients. *Journal of Clinical Child and Adolescent Psychology: The Official Journal for the Society of Clinical Child and Adolescent Psychology, American Psychological Association, Division 53*, 44(5), 751–761.
- Huth-Bocks, A. C., Kerr, D. C. R., Ivey, A. Z., Kramer, A. C., & King, C. A. (2007). Assessment of psychiatrically hospitalized suicidal adolescents: self-report instruments as predictors of suicidal thoughts and behavior. *Journal of the American Academy of Child and Adolescent Psychiatry*, 46(3), 387–395.
- Innamorati, M., Pompili, M., Ferrari, V., Girardi, P., Tatarelli, R., Tamburello, A., & Lester, D. (2008). Cannabis use and the risk behavior syndrome in Italian university students: are they related to suicide risk? *Psychological Reports*, 102(2), 577–594.
- Innamorati, M., Pompili, M., Lester, D., Tatarelli, R., & Girardi, P. (2008). Recreational drug use and suicidality among Italian young adults. *Journal of Addictive Diseases*, 27(4), 51–59.
- Jia, C.-X., Wang, X.-T., & Zhao, Z.-T. (2014). Psychometric properties of the suicidal ideation questionnaire among Chinese high school students. *Omega*, 70(2), 195–207.
- Katz, C., Roos, L. E., Wang, Y., Bolton, J., Hwang, S. W., Katz, L. Y., Bourque, J., Adair, C. E., Somers, J. M.,

- Sareen, J., & At Home/Chez Soi Investigators. (2019). Predictive Validity of the MINI Suicidality Subscale for Suicide Attempts in a Homeless Population With Mental Illness. *Suicide & Life-Threatening Behavior*, 49(6), 1630–1636.
- Katz, I., Barry, C. N., Cooper, S. A., Kaspro, W. J., & Hoff, R. A. (2020). Use of the Columbia-Suicide Severity Rating Scale (C-SSRS) in a large sample of Veterans receiving mental health services in the Veterans Health Administration. *Suicide & Life-Threatening Behavior*, 50(1), 111–121.
- Kaufman, J., Birmaher, B., Brent, D., Rao, U., Flynn, C., Moreci, P., Williamson, D., & Ryan, N. (1997). Schedule for Affective Disorders and Schizophrenia for School-Age Children-Present and Lifetime Version (K-SADS-PL): Initial Reliability and Validity Data. In *Journal of the American Academy of Child & Adolescent Psychiatry* (Vol. 36, Issue 7, pp. 980–988).
- Keane, E. M., Dick, R. W., Bechtold, D. W., & Manson, S. M. (1996). Predictive and concurrent validity of the Suicidal Ideation Questionnaire among American Indian adolescents. *Journal of Abnormal Child Psychology*, 24(6), 735–747.
- Kerr, D. C. R., Gibson, B., Leve, L. D., & Degarmo, D. S. (2014). Young adult follow-up of adolescent girls in juvenile justice using the Columbia suicide severity rating scale. *Suicide & Life-Threatening Behavior*, 44(2), 113–129.
- Kilincaslan, A., Gunes, A., Eskin, M., & Madan, A. (2019). Linguistic adaptation and psychometric properties of the Columbia-Suicide Severity Rating Scale among a heterogeneous sample of adolescents in Turkey. *International Journal of Psychiatry in Medicine*, 54(2), 115–132.
- King, C. A., Hovey, J. D., Brand, E., & Ghaziuddin, N. (1997). Prediction of positive outcomes for adolescent psychiatric inpatients. *Journal of the American Academy of Child and Adolescent Psychiatry*, 36(10), 1434–1442.
- King, C. A., Jiang, Q., Czyz, E. K., & Kerr, D. C. R. (2014). Suicidal ideation of psychiatrically hospitalized adolescents has one-year predictive validity for suicide attempts in girls only. *Journal of Abnormal Child Psychology*, 42(3), 467–477.
- Kingsbury, S. J. (1993). Clinical components of suicidal intent in adolescent overdose. *Journal of the American Academy of Child and Adolescent Psychiatry*, 32(3), 518–520.
- Larsson, B., Melin, L., Breitholtz, E., & Andersson, G. (1991). Short-term stability of depressive symptoms and suicide attempts in Swedish adolescents. In *Acta Psychiatrica Scandinavica* (Vol. 83, Issue 5, pp. 385–390).
- Levy, S. R., Jurkovic, G. L., & Spirito, A. (1995). A multisystems analysis of adolescent suicide attempters. *Journal of Abnormal Child Psychology*, 23(2), 221–234.
- Lewinsohn, P. M., Rohde, P., & Seeley, J. R. (1994). Psychosocial risk factors for future adolescent suicide attempts. *Journal of Consulting and Clinical Psychology*, 62(2), 297–305.
- Lewinsohn, P. M., Rohde, P., Seeley, J. R., & Baldwin, C. L. (2001). Gender differences in suicide attempts from

- adolescence to young adulthood. *Journal of the American Academy of Child and Adolescent Psychiatry*, 40(4), 427–434.
- Lindh, Å. U., Waern, M., Beckman, K., Renberg, E. S., Dahlin, M., & Runeson, B. (2018). Short term risk of non-fatal and fatal suicidal behaviours: the predictive validity of the Columbia-Suicide Severity Rating Scale in a Swedish adult psychiatric population with a recent episode of self-harm. *BMC Psychiatry*, 18(1), 1–9.
- Li, X., Ding, S., Lin, J., Hua, Y., Dong, F., Du, Y., Shen, J., Xia, N., Zhu, Z., Wang, X., Zheng, R., & Xu, H. (2019). Validation of the Chinese version of the Scale for Suicide Ideation-Worst in adult patients with epilepsy. *Epilepsy & Behavior: E&B*, 101(Pt A), 106586.
- Lohner, J., & Konrad, N. (2006). Deliberate self-harm and suicide attempt in custody: distinguishing features in male inmates' self-injurious behavior. *International Journal of Law and Psychiatry*, 29(5), 370–385.
- Madan, A., Frueh, B. C., Allen, J. G., & Ellis, T. E. (2016). Psychometric reevaluation of the Columbia–Suicide Severity Rating Scale: Findings from a prospective, inpatient cohort of severely mentally ill adults. *The Journal of Clinical*.  
<https://www.psychiatrist.com/JCP/article/Pages/psychometric-reevaluation-of-the-c-ssrs.aspx>
- Maier, W., Philipp, M., Heuser, I., Schlegel, S., Buller, R., & Wetzell, H. (1988). Improving depression severity assessment—I. Reliability, internal validity and sensitivity to change of three observer depression scales. *Journal of Psychiatric Research*, 22(1), 3–12.
- Matarazzo, B. B., Brown, G. K., Stanley, B., Forster, J. E., Billera, M., Currier, G. W., Ghahramanlou-Holloway, M., & Brenner, L. A. (2019). Predictive validity of the Columbia-Suicide Severity Rating Scale among a cohort of at-risk veterans. *Suicide & Life-Threatening Behavior*, 49(5), 1255–1265.
- McCall, W. V., Porter, B., Pate, A. R., Bolstad, C. J., Drapeau, C. W., Krystal, A. D., Benca, R. M., Rumble, M. E., & Nadorff, M. R. (2021). Examining suicide assessment measures for research use: Using item response theory to optimize psychometric assessment for research on suicidal ideation in major depressive disorder. *Suicide & Life-Threatening Behavior*, 51(6), 1086–1094.
- Mieczkowski, T. A., Sweeney, J. A., Haas, G. L., Junker, B. W., Brown, R. P., & Mann, J. J. (1993). Factor composition of the Suicide Intent Scale. *Suicide & Life-Threatening Behavior*, 23(1), 37–45.
- Montgomery, S. A., & Asberg, M. (1979). A new depression scale designed to be sensitive to change. *The British Journal of Psychiatry: The Journal of Mental Science*, 134, 382–389.
- Morriss, R., Leese, M., Chatwin, J., Baldwin, D., & THREAD Study Group. (2008). Inter-rater reliability of the Hamilton Depression Rating Scale as a diagnostic and outcome measure of depression in primary care. *Journal of Affective Disorders*, 111(2-3), 204–213.
- Mundt, J. C., Greist, J. H., Gelenberg, A. J., Katzelnick, D. J., Jefferson, J. W., & Modell, J. G. (2010). Feasibility and validation of a computer-automated Columbia-Suicide Severity Rating Scale using interactive voice response technology. *Journal of Psychiatric Research*, 44(16), 1224–1228.



- Nasser, E. H., & Overholser, J. C. (1999). Assessing varying degrees of lethality in depressed adolescent suicide attempters. *Acta Psychiatrica Scandinavica*, 99(6), 423–431.
- Nock, M. K., Holmberg, E. B., Photos, V. I., & Michel, B. D. (2007). Self-Injurious Thoughts and Behaviors Interview: development, reliability, and validity in an adolescent sample. *Psychological Assessment*, 19(3), 309–317.
- Nock, M. K., & Kazdin, A. E. (2002). Examination of affective, cognitive, and behavioral factors and suicide-related outcomes in children and young adolescents. *Journal of Clinical Child and Adolescent Psychology: The Official Journal for the Society of Clinical Child and Adolescent Psychology, American Psychological Association, Division 53*, 31(1), 48–58.
- Nurnberger, J. I., Blehar, M. C., Kaufmann, C. A., York-Cooler, C., Simpson, S. G., Harkavy-Friedman, J., Severe, J. B., Malaspina, D., & Reich, T. (1994). Diagnostic Interview for Genetic Studies: Rationale, Unique Features, and Training. *Archives of General Psychiatry*, 51(11), 849–859.
- Parris, M. S., Marver, J. E., Chaudhury, S. R., Ellis, S. P., Metts, A. V., Keilp, J. G., Burke, A. K., Oquendo, M. A., Mann, J. J., & Grunebaum, M. F. (2018). Effects of anxiety on suicidal ideation: exploratory analysis of a paroxetine versus bupropion randomized trial. *International Clinical Psychopharmacology*, 33(5), 249–254.
- Pinninti, N., Steer, R. A., Rissmiller, D. J., Nelson, S., & Beck, A. T. (2002). Use of the Beck Scale for suicide ideation with psychiatric inpatients diagnosed with schizophrenia, schizoaffective, or bipolar disorders. *Behaviour Research and Therapy*, 40(9), 1071–1079.
- Pinto, A., Whisman, M. A., & McCoy, K. J. M. (1997). Suicidal ideation in adolescents: Psychometric properties of the suicidal ideation questionnaire in a clinical sample. *Psychological Assessment*, 9(1), 63–66.
- Posner, K., Brown, G. K., Stanley, B., Brent, D. A., Yershova, K. V., Oquendo, M. A., Currier, G. W., Melvin, G. A., Greenhill, L., Shen, S., & Mann, J. J. (2011). The Columbia–Suicide Severity Rating Scale: Initial Validity and Internal Consistency Findings From Three Multisite Studies With Adolescents and Adults. *American Journal of Psychiatry*, 168(12), 1266–1277.
- Potard, C., Kubiszewski, V., Gimenes, G., & Courtois, R. (2014). Validation of the French version of the Suicidal Ideation Questionnaire among adolescents. *Psychiatry Research*, 215(2), 471–476.
- Potts, M. K., Daniels, M., Burnam, M. A., & Wells, K. B. (1990). A structured interview version of the Hamilton Depression Rating Scale: evidence of reliability and versatility of administration. *Journal of Psychiatric Research*, 24(4), 335–350.
- Poznanski, E. O., & Mokros, H. B. (1996). *Children's depression rating scale, revised (CDRS-R)*.  
<http://www.highriskdepression.org/forms/Childrens%20Depression%20Rating%20Scale-Revised.pdf>
- Reynolds, W. M. (1987). Suicidal ideation questionnaire (SIQ). *Odessa, FL: Psychological Assessment Resources*. <http://www.v-psyche.com/doc/Clinical%20Test/Suicidal%20Ideation%20Questionnaire.doc>
- Reynolds, W. M. (1988). *SIQ, Suicidal Ideation Questionnaire: Professional Manual*. Psychological Assessment

## Resources.

- Reynolds, W. M., & Mazza, J. J. (1999). Assessment of Suicidal Ideation in Inner-City Children and Young Adolescents: Reliability and Validity of the Suicidal Ideation Questionnaire-JR. *School Psychology Review*, 28(1), 17–30.
- Roadset, J. O., Linaker, O. M., & Bjørkly, S. (2012). Predictive validity of the MINI suicidal scale for self-harm in acute psychiatry: a prospective study of the first year after discharge. *Archives of Suicide Research: Official Journal of the International Academy for Suicide Research*, 16(4), 287–302.
- Rucci, P., Frank, E., Scocco, P., Calugi, S., Miniati, M., Fagiolini, A., & Cassano, G. B. (2011). Treatment-emergent suicidal ideation during 4 months of acute management of unipolar major depression with SSRI pharmacotherapy or interpersonal psychotherapy in a randomized clinical trial. *Depression and Anxiety*, 28(4), 303–309.
- Rudd, M. D., Rajab, M. H., Orman, D. T., Joiner, T., Stulman, D. A., & Dixon, W. (1996). Effectiveness of an outpatient intervention targeting suicidal young adults: preliminary results. *Journal of Consulting and Clinical Psychology*, 64(1), 179–190.
- Rush, A. J., Giles, D. E., Schlessler, M. A., Fulton, C. L., Weissenburger, J., & Burns, C. (1986). The Inventory for Depressive Symptomatology (IDS): preliminary findings. *Psychiatry Research*, 18(1), 65–87.
- Serrani Azcurra, D. (2017). Psychometric validation of the Columbia-Suicide Severity rating scale in Spanish-speaking adolescents. *Colombia Medica*, 48(4), 174–182.
- Sheehan, D. V., Lecrubier, Y., Sheehan, K. H., Amorim, P., Janavs, J., Weiller, E., Hergueta, T., Baker, R., & Dunbar, G. C. (1998). The Mini-International Neuropsychiatric Interview (M.I.N.I.): The development and validation of a structured diagnostic psychiatric interview for DSM-IV and ICD-10. *The Journal of Clinical Psychiatry*, 59(20), 22–33.
- Skogman, K., Alsén, M., & Öjehagen, A. (2004). Sex differences in risk factors for suicide after attempted suicide. *Social Psychiatry and Psychiatric Epidemiology*, 39(2), 113–120.
- Spirito, A., Sterling, C. M., Donaldson, D. L., & Arrigan, M. E. (1996). Factor analysis of the suicide intent scale with adolescent suicide attempters. *Journal of Personality Assessment*, 67(1), 90–101.
- Steer, R. A., Kumar, G., & Beck, A. T. (1993). Self-reported suicidal ideation in adolescent psychiatric inpatients. *Journal of Consulting and Clinical Psychology*, 61(6), 1096–1099.
- Stefansson, J., Nordström, P., & Jokinen, J. (2012). Suicide Intent Scale in the prediction of suicide. *Journal of Affective Disorders*, 136(1-2), 167–171.
- Suominen, K., Isometsä, E., Ostamo, A., & Lönnqvist, J. (2004). Level of suicidal intent predicts overall mortality and suicide after attempted suicide: a 12-year follow-up study. *BMC Psychiatry*, 4, 11.
- Takahashi, N., Tomita, K., Higuchi, T., & Inada, T. (2004). The inter-rater reliability of the Japanese version of the Montgomery–Asberg depression rating scale(MADRS) using a structured interview guide for

- MADRS(SIGMA). In *Human Psychopharmacology: Clinical and Experimental* (Vol. 19, Issue 3, pp. 187–192).
- Tejedor, M. C., Díaz, A., Castellón, J. J., & Pericay, J. M. (1999). Attempted suicide: repetition and survival--findings of a follow-up study. *Acta Psychiatrica Scandinavica*, *100*(3), 205–211.
- Valtonen, H. M., Suominen, K., Sokero, P., Mantere, O., Arvilommi, P., Leppämäki, S., & Isometsä, E. T. (2009). How suicidal bipolar patients are depends on how suicidal ideation is defined. *Journal of Affective Disorders*, *118*(1-3), 48–54.
- Vitiello, B., Silva, S. G., Rohde, P., Kratochvil, C. J., Kennard, B. D., Reinecke, M. A., Mayes, T. L., Posner, K., May, D. E., & March, J. S. (2009). Suicidal events in the Treatment for Adolescents With Depression Study (TADS). *The Journal of Clinical Psychiatry*, *70*(5), 741–747.
- Vuorilehto, M., Valtonen, H. M., Melartin, T., Sokero, P., Suominen, K., & Isometsä, E. T. (2014). Method of assessment determines prevalence of suicidal ideation among patients with depression. *European Psychiatry: The Journal of the Association of European Psychiatrists*, *29*(6), 338–344.
- Watson, D., O'Hara, M. W., Naragon-Gainey, K., Koffel, E., Chmielewski, M., Kotov, R., Stasik, S. M., & Ruggero, C. J. (2012). Development and validation of new anxiety and bipolar symptom scales for an expanded version of the IDAS (the IDAS-II). *Assessment*, *19*(4), 399–420.
- Watson, D., O'Hara, M. W., Simms, L. J., Kotov, R., Chmielewski, M., McDade-Montez, E. A., Gamez, W., & Stuart, S. (2007). Development and validation of the Inventory of Depression and Anxiety Symptoms (IDAS). In *Psychological Assessment* (Vol. 19, Issue 3, pp. 253–268).
- Wenzel, A., Berchick, E. R., Tenhave, T., Halberstadt, S., Brown, G. K., & Beck, A. T. (2011). Predictors of suicide relative to other deaths in patients with suicide attempts and suicide ideation: a 30-year prospective study. *Journal of Affective Disorders*, *132*(3), 375–382.
- WHO. (1997). *CIDI-Auto Version 2.1: Administrator's guide and reference*.
- Williams, J. B. W. (1988). A Structured Interview Guide for the Hamilton Depression Rating Scale. In *Archives of General Psychiatry* (Vol. 45, Issue 8, p. 742).
- Youngstrom, E. A., Hameed, A., Mitchell, M. A., Van Meter, A. R., Freeman, A. J., Algorta, G. P., White, A. M., Clayton, P. J., Gelenberg, A. J., & Meyer, R. E. (2015). Direct comparison of the psychometric properties of multiple interview and patient-rated assessments of suicidal ideation and behavior in an adult psychiatric inpatient sample. *The Journal of Clinical Psychiatry*, *76*(12), 0–0.
- Zhang, J., & Brown, G. K. (2007). Psychometric properties of the scale for suicide ideation in China. *Archives of Suicide Research: Official Journal of the International Academy for Suicide Research*, *11*(2), 203–210.
- Zhang, J., & Jia, C. (2011). Suicidal intent among young suicides in rural China. *Archives of Suicide Research: Official Journal of the International Academy for Suicide Research*, *15*(2), 127–139.
- Zhang, J., & Norvilitis, J. M. (2002). Measuring Chinese psychological well-being with Western developed

instruments. *Journal of Personality Assessment*, 79(3), 492–511.

Zhang, Y., Yip, P. S. F., & Fu, K.-W. (2014). Validation of the Chinese version of the Reynolds' Suicidal Ideation Questionnaire: psychometric properties and its short version. *Health and Quality of Life Outcomes*, 12, 33.
